# Supplementary material
Source: publisher figshare collection journal article supplement (https://acs.figshare.com/ndownloader/files/6452508)

Supporting Information to

Evidence for Dramatic Acceleration of an C-H Bond Ionization Rate in Thiamin  
Diphosphate Enzymes by the Protein Environment.

By Sheng Zhang, Leon Zhou, Natalia Nemeria, Yan Yan, Zhen Zhang, Yu Zou and Frank  
Jordan

Table S1.

Ratio of ion intensities for a pair of compounds bearing  
-CH<sub>3</sub> or -CD<sub>3</sub> varies linearly with the concentration ratio.

| Concentration Ratio                | Ion Intensity Ratio                |
|------------------------------------|------------------------------------|
| -CH <sub>3</sub> /-CD <sub>3</sub> | -CH <sub>3</sub> /-CD <sub>3</sub> |
| 0.001957                           | 0.002183                           |
| 0.004891                           | 0.004648                           |
| 0.009783                           | 0.008271                           |
| 0.019566                           | 0.017552                           |
| 0.048914                           | 0.046957                           |
| 0.097828                           | 0.090059                           |
| 0.195657                           | 0.18400                            |

Figure legends.

Figure S1. Ionization response versus concentration ratio with a pair of model compounds with a  $\text{CH}_3$  or  $\text{CD}_3$  substituent.

Figure S2. MALDI-TOF mass spectrum of the lipoyl domain after 40 min incubation with PDHc-E1 (0.10  $\mu\text{M}$ ) and HETHDP (0.20 mM). The spectrum shows the molecular ions for acetylated (mass = 9022.73 Da) and unacetylated (mass= 8979.22 Da) lipoyl domain.

Inset shows time dependence of reductive acetylation of the lipoyl domain by HETHDP and PDHc-E1: curve (1) depletion of unacetylated lipoyl domain; curve (2) formation of reductively acetylated lipoyl domain.

Figure S3. Time-course of HETHDP- $\text{C}2\alpha\text{-d}_1$  formation from HETHDP (2.5 mM) after incubation with PDHc-E1. In the inset ( $\delta$  1.62-1.66 ppm region of the  $^1\text{H}$  NMR spectrum), the peaks of the doublet on the left (peaks  $A_l$  and  $A_r$ ) show the spectrum prior to H/D exchange for the resonances corresponding to the  $\text{C}2\beta\text{H}_3$ s, with the integral of the left peak ( $A_l$ ) equal to that of right peak ( $A_r$ ). Replacement of  $\text{C}2\alpha\text{H}$  by  $\text{C}2\alpha\text{D}$  converts the  $\text{C}2\beta\text{H}_3$  doublet to a singlet, and shifts the  $\text{C}2\beta\text{H}_3$  resonance to higher field by about 3 Hz. The peaks on the right (after 15 hours) represent a mixture of HETHDP and HETHDP- $\text{d}_1$ , the singlet peak of the  $\text{C}2\beta$  protons derived from HETHDP- $\text{d}_1$  overlaps with the right-hand peak of the doublet of the  $\text{C}2\beta$  protons derived from HETHDP. Therefore, the peak  $B_l$  corresponds to one half of the HETHDP concentration, and the peak  $B_r$  corresponds to one half of the HETHDP concentration plus the HETHDP- $\text{d}_1$  concentration. For quantification, the integral ( $2 \times B_l$ ) represents the HETHDP, while the difference ( $B_r - B_l$ ) the HETHDP- $\text{d}_1$  concentration.

Figure S1. S. Zhang et al.

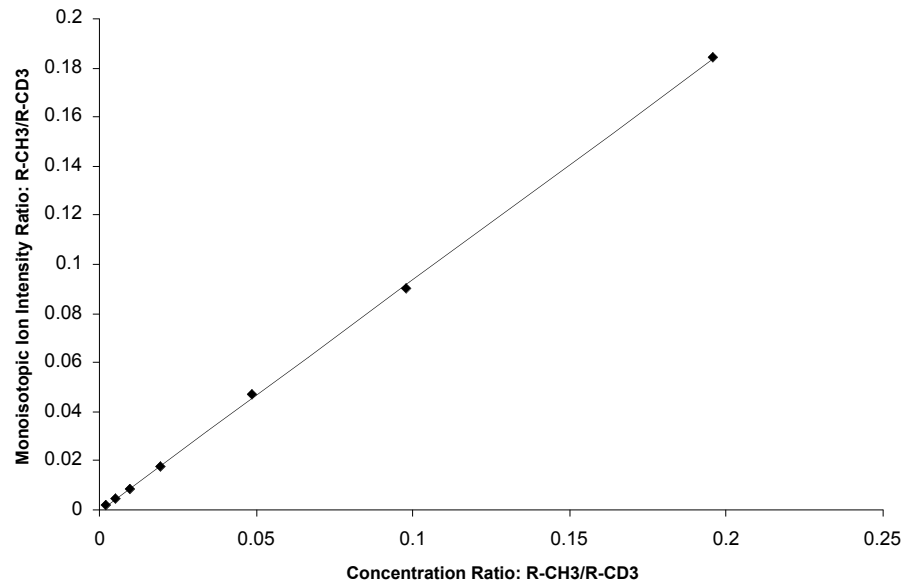

Figure S2. S. Zhang et al.

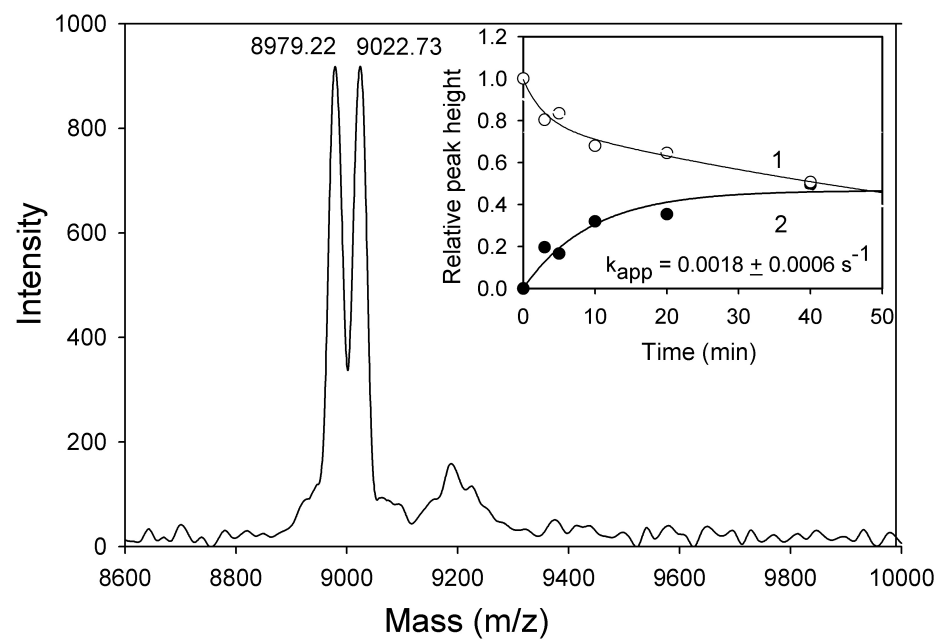

Figure S3. S. Zhang et al.

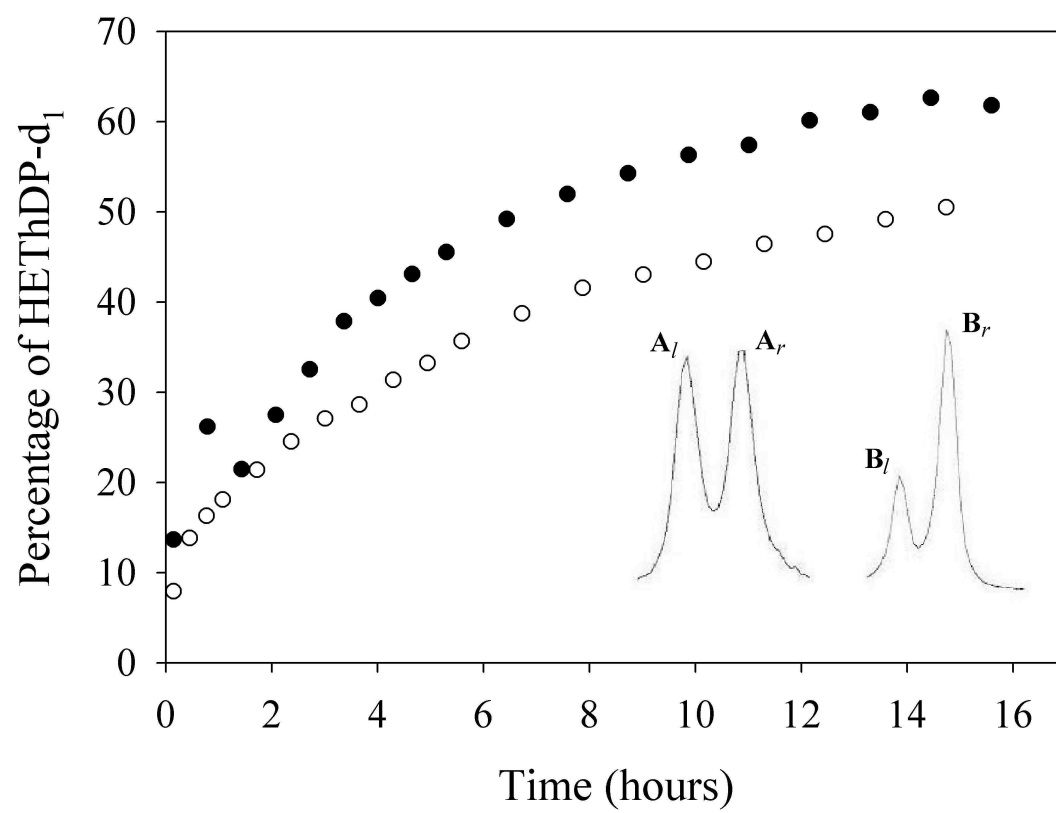

Supplement: Supplementary file 1 [file 6452508]
